# Supplementary material for: Synthesis of pH-responsive amphiphilic branched macro-RAFT agent and the application in surfactant-free emulsion polymerization
Source: Royal Society of Chemistry journal article supplement (doi:10.1039/c6ra05634b), 2016-01-01
Supplement: c6ra05634b1.pdf [file c6ra05634b1.pdf]

## **Supplementary information**

# **Synthesis of pH-responsive Amphiphilic Branched Macro-RAFT Agent and the Application in Surfactant-free Emulsion Polymerization**

Yong-Fu Diao, Wei Cui, Yu-Lin Zhang, Ling-Ying Shi, and Rong Ran\*

College of Polymer Science and Engineering, State Key Laboratory of Polymer  
Materials Engineering, Sichuan University, Chengdu, 610065, China

\*Corresponding author. Email address: ranrong@scu.edu.cn

Tel: +86-28-85462890, Fax: +86-28-85462890

In Fig. 1, the FTIR spectrum of the the PMA<sub>80</sub>-b-HBPtBA<sub>80</sub> obtained by RAFT polymerization of tBA in presence of PMA<sub>80</sub>-TTC as a RAFT agent, peaks at 1370cm<sup>-1</sup> corresponded to tert-butyl group. After hydrolysis reaction between tert-butyl group and TFA, the band corresponded to tert-butyl group obviously disappeared and the bands at 3450 cm<sup>-1</sup> corresponded to the characteristic in carboxyl group appeared in the FTIR spectrum of the PMA<sub>80</sub>-b-HBPAA<sub>80</sub>. It confirmed the success of hydrolysis reaction between tert-butyl group and TFA.

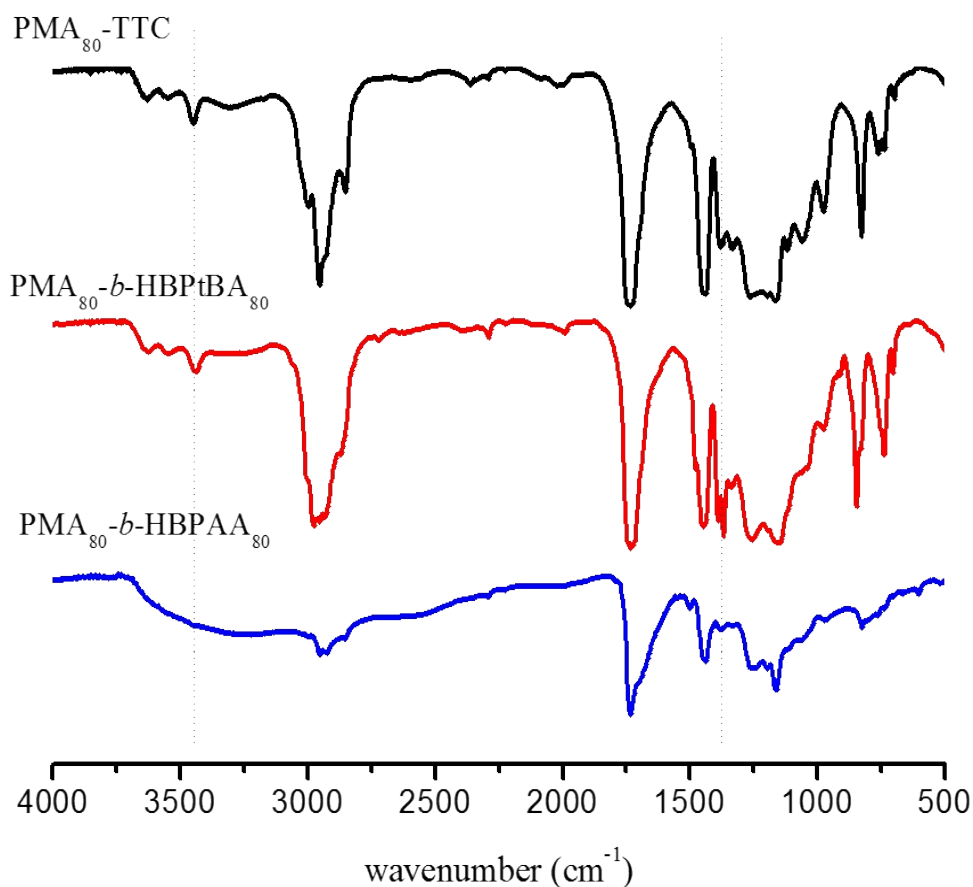

Fig. 1 FT-IR spectra of PMA<sub>80</sub>-TTC, PMA<sub>80</sub>-b-HBPtBA<sub>80</sub> and PMA<sub>80</sub>-b-HBPAA<sub>80</sub>.

The <sup>1</sup>HNMR spectra of PMA<sub>80</sub>-TTC, PMA<sub>80</sub>-b-HBPtBA<sub>80</sub> and PMA<sub>80</sub>-b-HBPAA<sub>80</sub> were showed in Fig. 2, 1.44 ppm corresponded to tert-butyl group and  $\delta$

(TMS): 11.93 ppm and 12.86 ppm corresponded to the characteristic in carboxyl group.

It further proved the success of hydrolysis reaction between tert-butyl group and TFA.

Through the above analysis, it is successful to acquire information on chain structures

of macro-RAFT agents of PMA<sub>80</sub>-TTC, PMA<sub>80</sub>-*b*-HBPtBA<sub>80</sub> and PMA<sub>80</sub>-*b*-HBPA<sub>80</sub>.

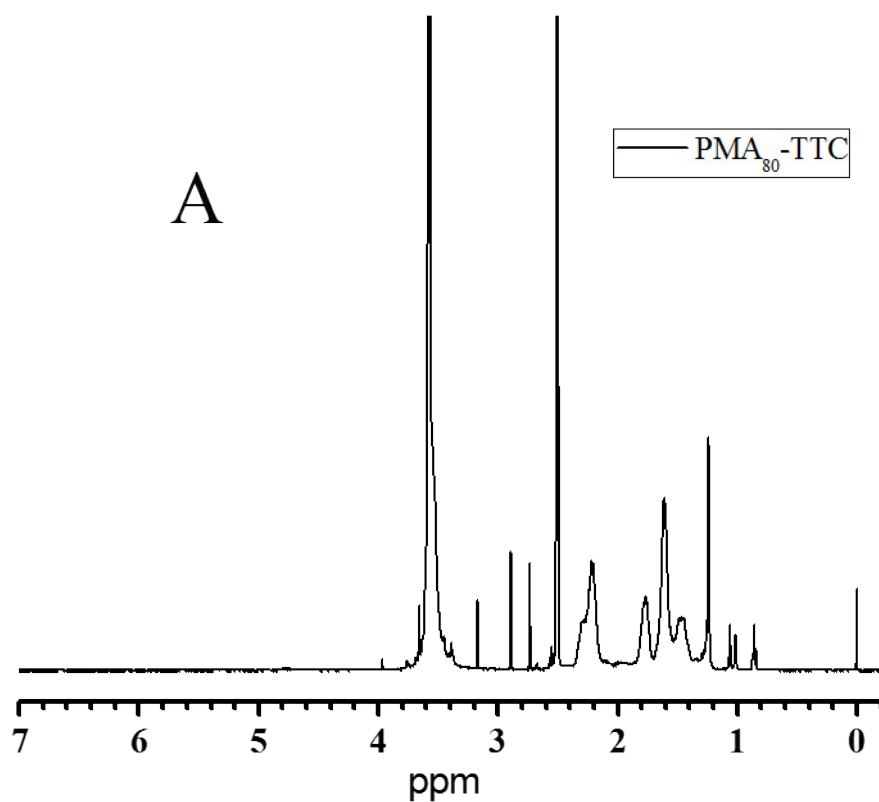

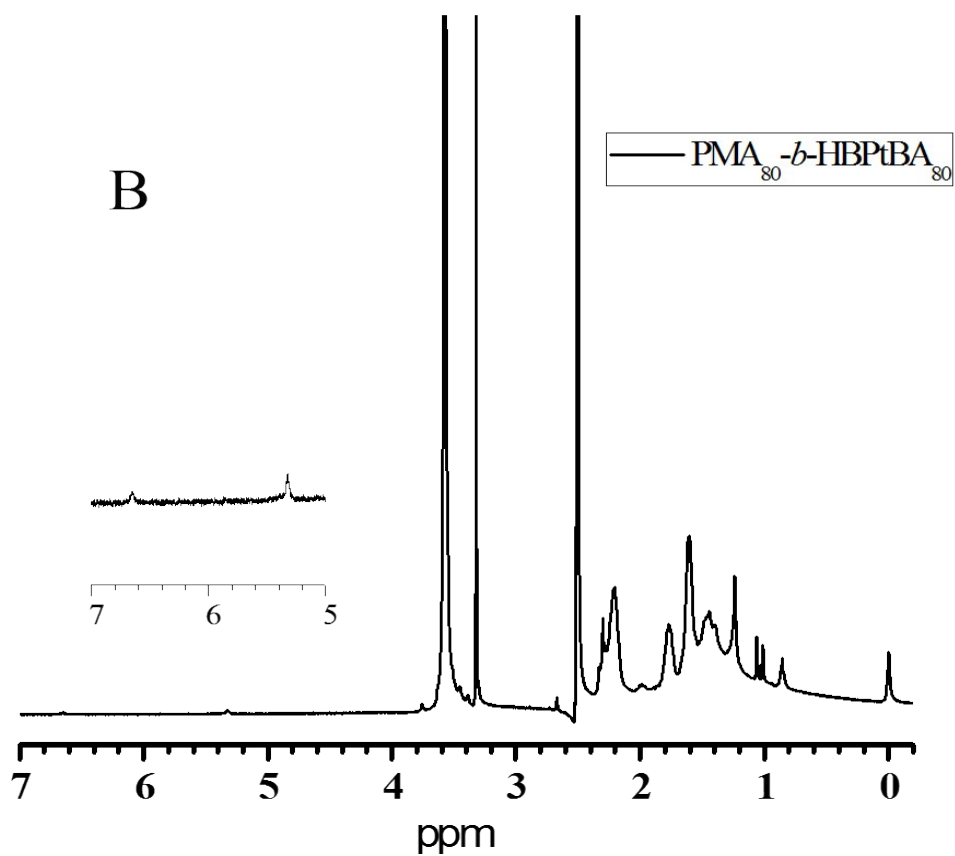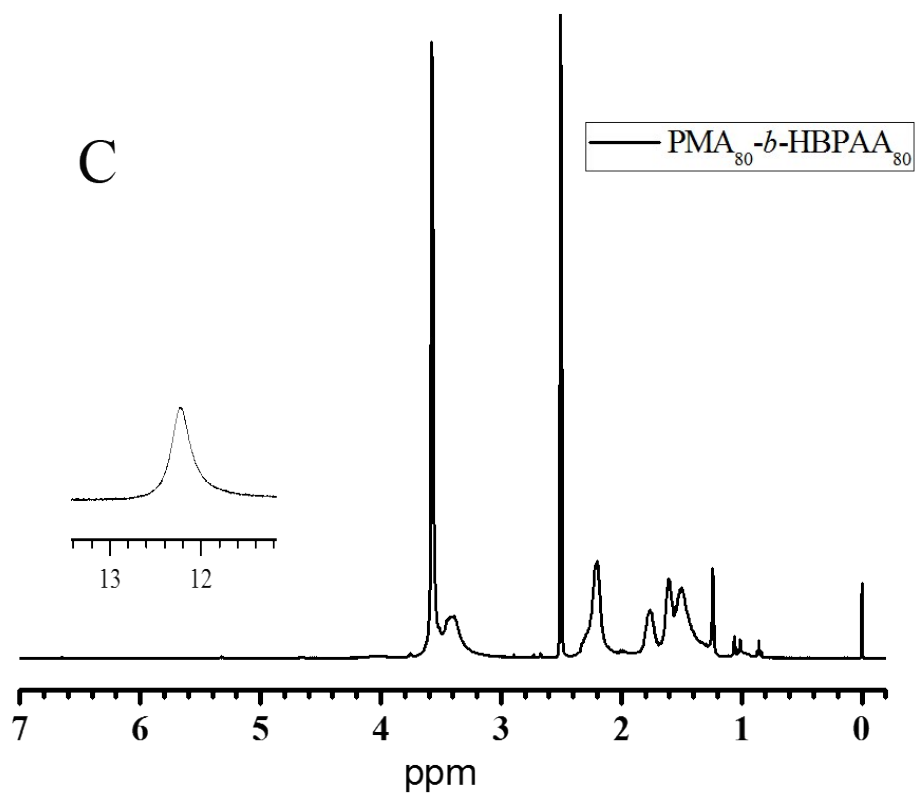

Fig.2 <sup>1</sup>H NMR spectra of (A) PMA<sub>80</sub>-TTC, (B) PMA<sub>80</sub>-*b*-HBptBA<sub>80</sub> and (C) PMA<sub>80</sub>-*b*-HBPAAs<sub>80</sub>.

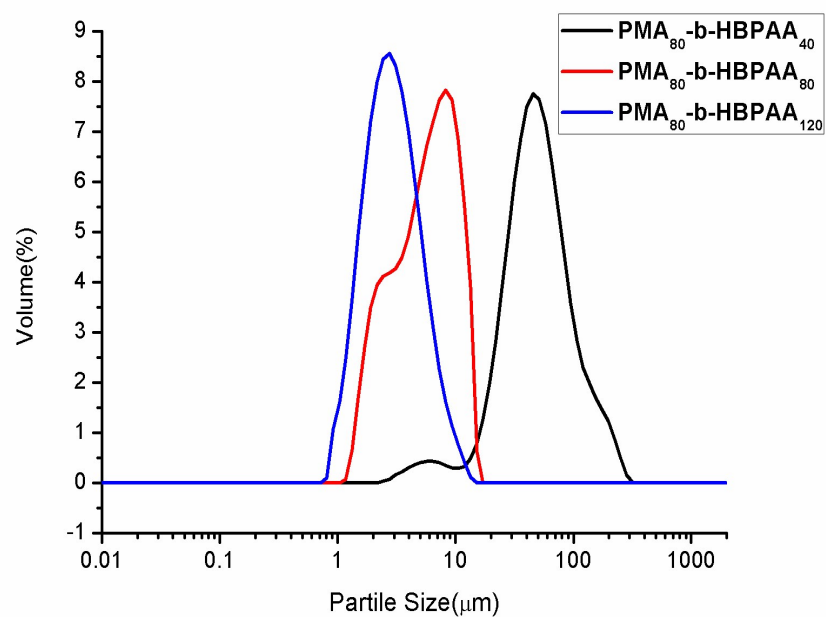

Fig.3.The particle size distribution in the emulsions prepared using (D1) PMA<sub>80</sub>- b-HBPAA<sub>40</sub>, (E1) PMA<sub>80</sub>- b-HBPAA<sub>80</sub>, (F1) PMA<sub>80</sub>- b-HBPAA<sub>120</sub>, at a fixed pH=3.0.

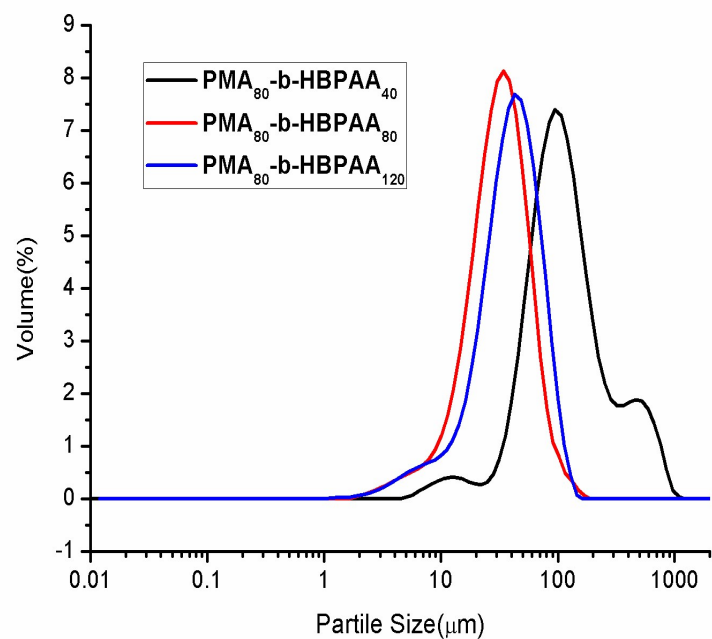

Fig.4.The particle size distribution in the emulsions prepared using (D2) PMA<sub>80</sub>- b-HBPAA<sub>40</sub>, (E2) PMA<sub>80</sub>- b-HBPAA<sub>80</sub>, (F2) PMA<sub>80</sub>- b-HBPAA<sub>120</sub>, at a fixed pH=12.0.

Table 1<sup>a</sup> Uniformity of particles for toluene/water emulsions prepared using different branched copolymers.

| pH   | branched copolymers                        | Uniformity |
|------|--------------------------------------------|------------|
| 3.0  | PMA <sub>80</sub> - b-HBPAA <sub>40</sub>  | 0.443      |
|      | PMA <sub>80</sub> - b-HBPAA <sub>80</sub>  | 0.503      |
|      | PMA <sub>80</sub> - b-HBPAA <sub>120</sub> | 0.559      |
| 12.0 | PMA <sub>80</sub> - b-HBPAA <sub>40</sub>  | 0.372      |
|      | PMA <sub>80</sub> - b-HBPAA <sub>80</sub>  | 0.439      |
|      | PMA <sub>80</sub> - b-HBPAA <sub>120</sub> | 0.431      |

a. Uniformity of particles was directly measured by Malvern laser particle size analyzer.

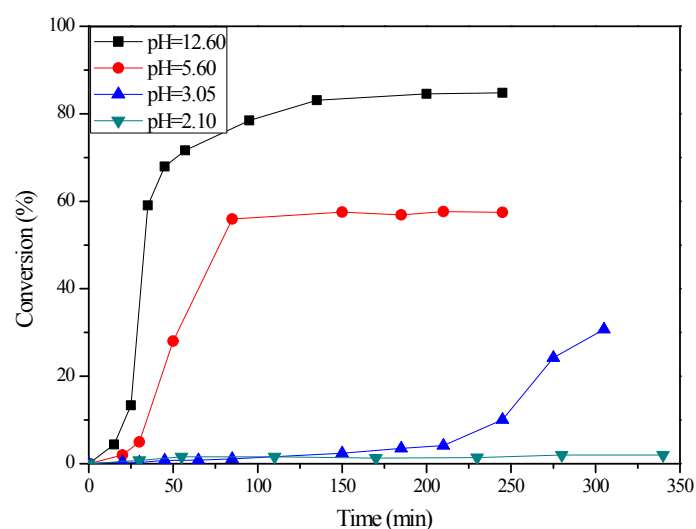

Fig.5. Evolution of monomer conversion versus time for the RAFT emulsion polymerizations of St mediated by PMA<sub>80</sub>-b-HBPAA<sub>120</sub> at different pH with [St]/[PMA<sub>80</sub>-b-HBPAA<sub>120</sub>]/[ACPA]=5400/7/2, [ACPA]/[NaHCO<sub>3</sub>]=1/3.5, [St]=16.7wt%.

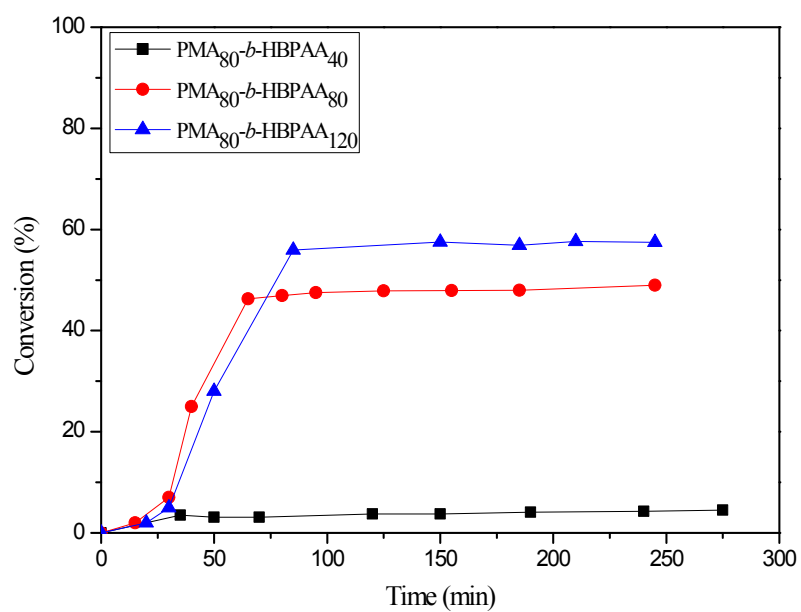

Fig.6 Evolution of monomer conversion versus time for the RAFT emulsion polymerizations of St mediated by PMA<sub>80</sub>-*b*-HBPA<sub>A</sub><sub>y</sub> with pH=5.5, [St]/[PMA<sub>80</sub>-*b*-HBPA<sub>A</sub><sub>y</sub>]/[ACPA]= 5400/7/2, [ACPA]/[NaHCO<sub>3</sub>]=1/3.5, [St]=16.7wt%.
